# Supplementary material for: Elucidating the role of H2O in promoting the formation of methacrylic acid during the oxidation of methacrolein over heteropolyacid compounds
Source: Royal Society of Chemistry journal article supplement (doi:10.1039/c9fd00135b), 2019-12-20
Supplement: c9fd00135b1.pdf [file c9fd00135b1.pdf]

## Supplementary Figures

### **Elucidating the role of H<sub>2</sub>O in promoting the formation of methacrylic acid during the oxidation of methacrolein over heteropolyacid compounds**

*Sarayute Chansai<sup>1</sup>, Yuki Kato<sup>2</sup>, Wataru Ninomiya<sup>2</sup>, and Christopher  
Hardacre<sup>1,\*</sup>*

<sup>1</sup>*Department of Chemical Engineering and Analytical Science, The Mill, Sackville Street, The  
University Manchester, Manchester M13 9PL, U.K.*

<sup>2</sup>*Mitsubishi Chemical Corporation, Hiroshima R&D Centre, 20-1 Miyuki-cho, Otake-shi,  
Hiroshima 739-0693, Japan*

\*Corresponding author: [c.hardacre@manchester.ac.uk](mailto:c.hardacre@manchester.ac.uk)

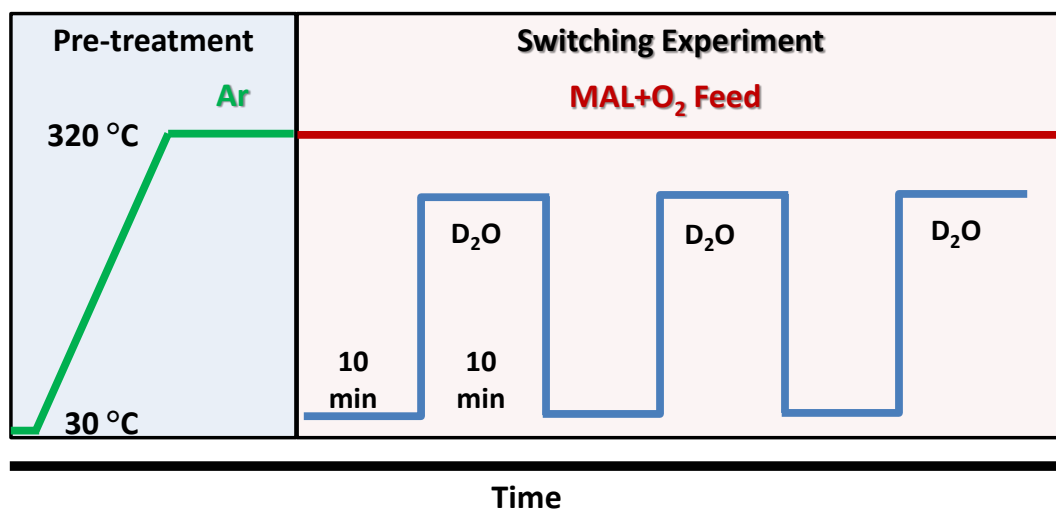

**Figure S1** Switching experimental profile with switches of D<sub>2</sub>O in and out of MAL+O<sub>2</sub>.

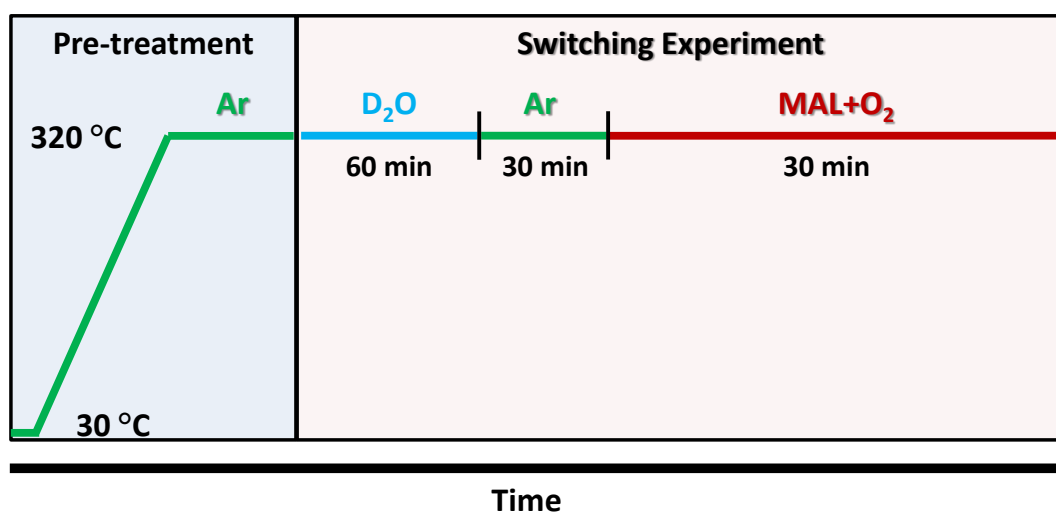

**Figure S2** Transient experimental profile and the effect of D<sub>2</sub>O pre-adsorption.

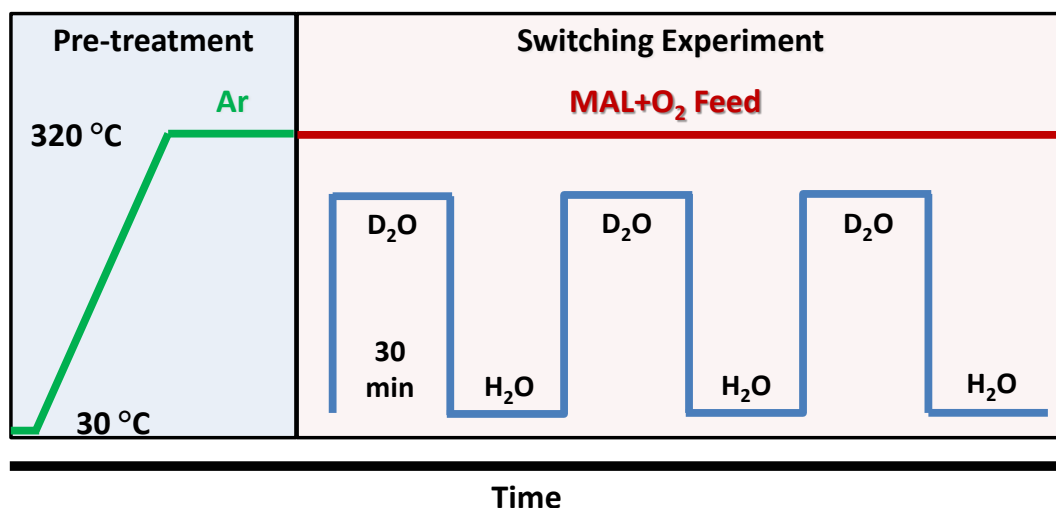

**Figure S3** Experimental profile with isotopic switches between D<sub>2</sub>O and H<sub>2</sub>O.

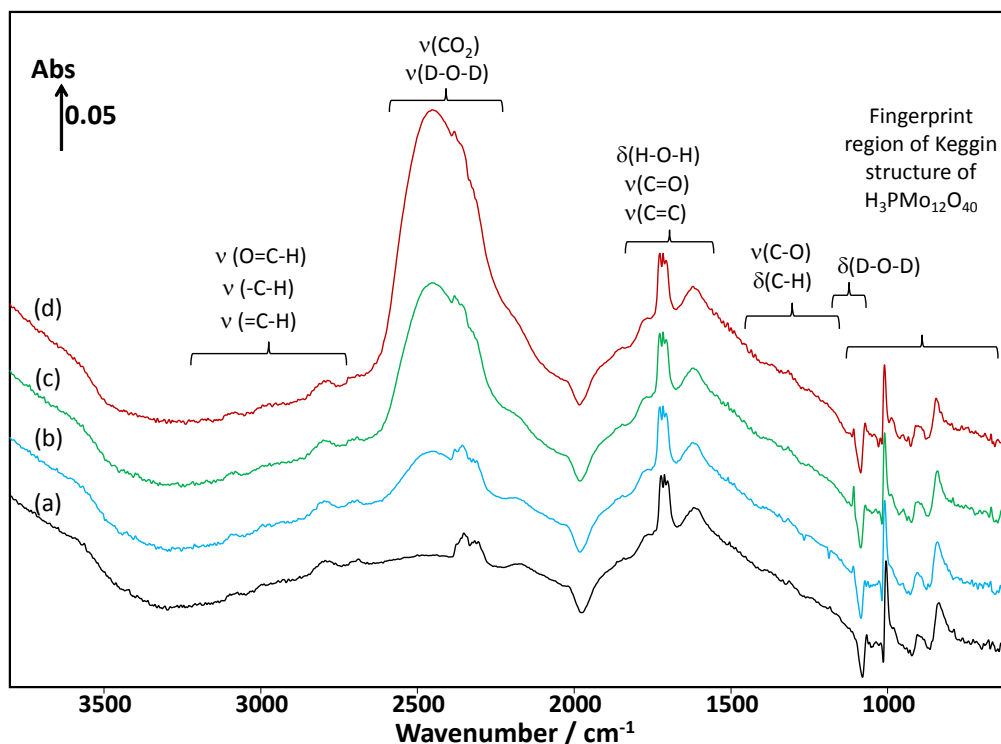

**Figure S4** *In-situ* DRIFTS spectra recorded as a function of time on stream under MAL+O<sub>2</sub>+H<sub>2</sub>O gas feed at 320 °C after 0.5 min (a), 1 min (b), 2 min (c), and 3 min (d). Feed conditions is composed of 2% MAL, 4% O<sub>2</sub>, 4% D<sub>2</sub>O, and Ar balance and the total flow rate is 50 cm<sup>3</sup> min<sup>-1</sup>. IR background was taken over H<sub>3</sub>PMo<sub>12</sub>O<sub>40</sub> catalyst at 320 °C after 60 min Ar pre-treatment at 320 °C.

*Elucidating the role of H<sub>2</sub>O in promoting the formation of methacrylic acid during the oxidation of methacrolein over heteropolyacid compounds*

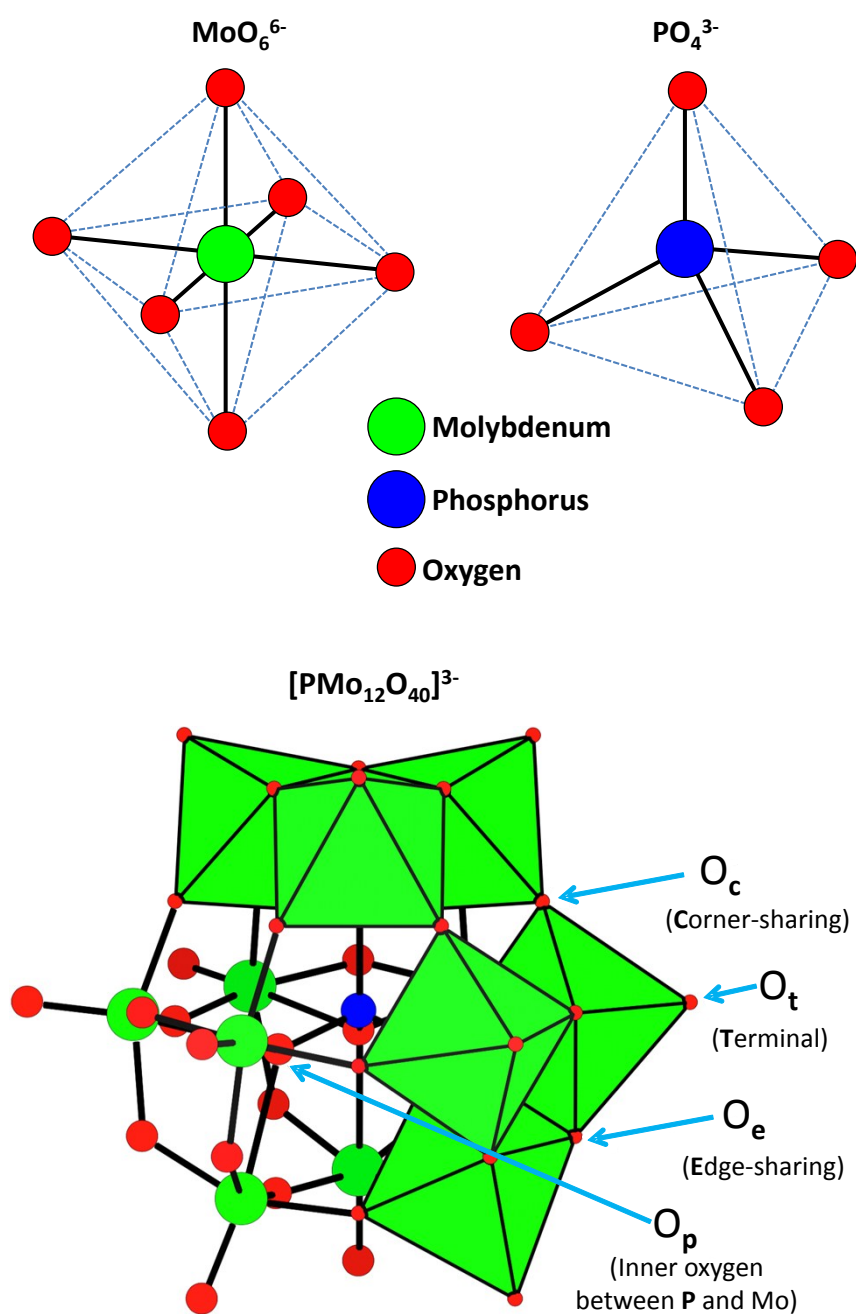

**Figure S5** Typical structure of Keggin-type heteropolyacid catalyst.

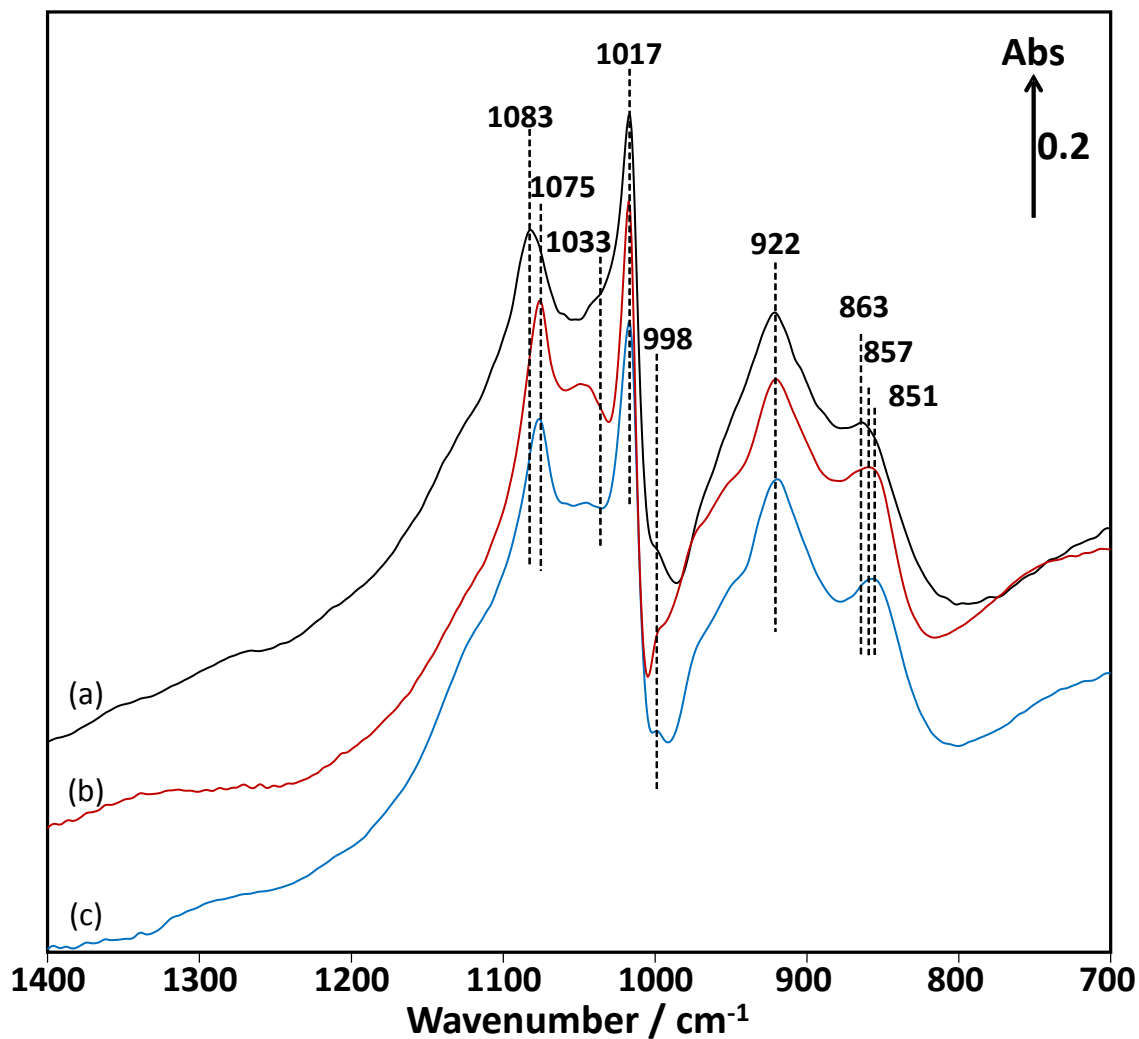

**Figure S6** Comparison of *in-situ* DRIFT spectra (1400 – 700 cm<sup>-1</sup>) of Keggin-type H<sub>3</sub>PMo<sub>12</sub>O<sub>40</sub>, recorded at 320 °C after 60 min under Ar pre-treatment (a), after 60 min under D<sub>2</sub>O pre-adsorption (b), and after 30 min under MAL+O<sub>2</sub> feed (c). Feed conditions is composed of 2% MAL, 4% O<sub>2</sub>, 4% D<sub>2</sub>O (when added) and Ar balance and the total flow rate is 50 cm<sup>3</sup> min<sup>-1</sup>.

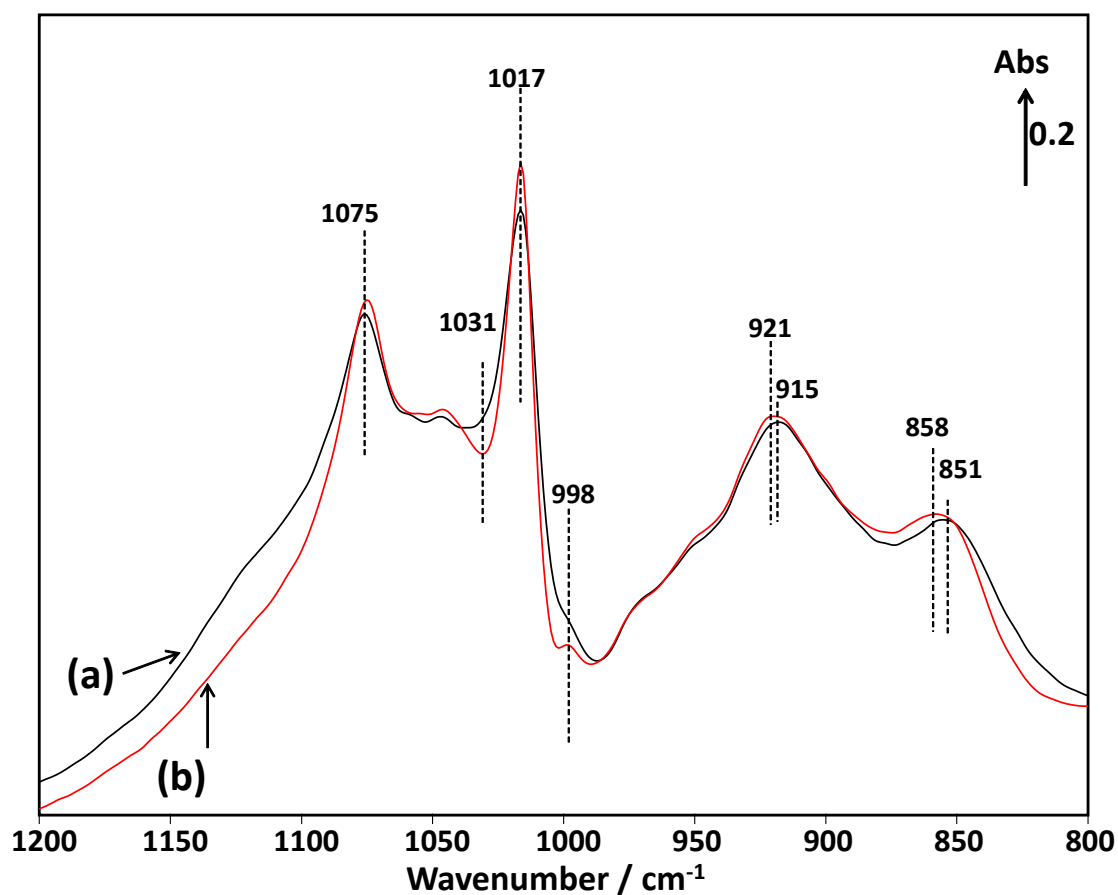

**Figure S7** A comparison of *in situ* DRIFTS spectra (1400 – 700 cm<sup>-1</sup>) of Keggin-type H<sub>3</sub>PMo<sub>12</sub>O<sub>40</sub>, recorded at 320 °C at steady state conditions under MAL+O<sub>2</sub>+H<sub>2</sub>O (a) and MAL+O<sub>2</sub>+D<sub>2</sub>O (b). Feed conditions is composed of 2% MAL, 4% O<sub>2</sub>, 4% D<sub>2</sub>O and H<sub>2</sub>O (when added), and Ar balance and the total flow rate is 50 cm<sup>3</sup> min<sup>-1</sup>.

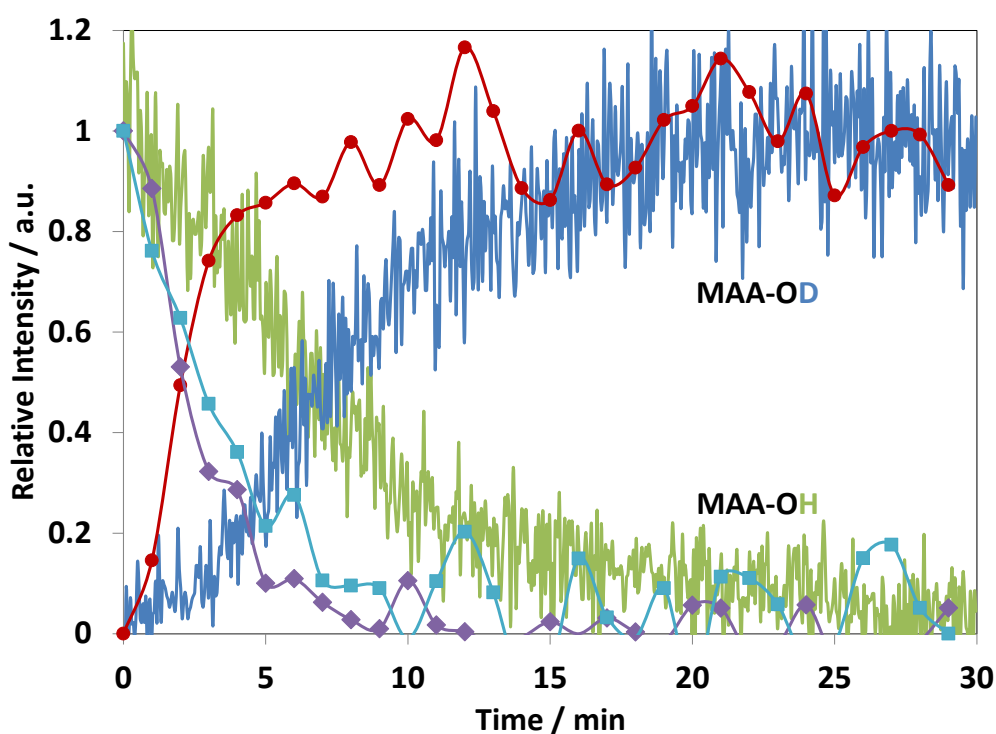

**Figure S8** Evolution with time of changes of the relative intensities of the DRIFT spectra of MoO<sub>4</sub>H (■, 1031 cm<sup>-1</sup>), Mo=O<sub>t</sub> (●, 1017 cm<sup>-1</sup>), and MoO<sub>4</sub>H (◆, 998 cm<sup>-1</sup>), and the corresponding mass spectrometry signal of gas phase MAA-OD and MAA-OH observed during the isotopic cycling switches over H<sub>3</sub>PMoO<sub>12</sub>O<sub>40</sub> at 320 °C under D<sub>2</sub>O+MAL+O<sub>2</sub> feed. Feed conditions is composed of 2% MAL, 4% O<sub>2</sub>, 4% D<sub>2</sub>O and H<sub>2</sub>O (when added), and Ar balance and the total flow rate is 50 cm<sup>3</sup> min<sup>-1</sup>.
